# Supplementary material
Source: Elsevier journal article supplement (https://www.sciencedirect.com/science/article/pii/S1138359318303745)
Supplement: mmc1 [file S1138359318303745:mmc1.docx]

ANEXO: **CUESTIONARIO DE INVESTIGACION**

Desde el Dto. de Investigación del Centro XXXXXXXXXXXXXXXXXXXXXXXXXXXXXX queremos **profundizar en los conocimientos y preferencias** de los participantes de las jornadas sobre el **proceso de toma de decisiones al final de la vida**. Para ello le pedimos que conteste a las siguientes preguntas. Este cuestionario es voluntario y confidencial, solo le tomará unos minutos y sus respuestas serán anónimas.

**Para empezar necesitamos algunos datos sobre las personas que responden. Por favor, seleccione:**

| **Soy:** € Hombre € Mujer  **Mi edad**:años | **Mi nivel de estudios (elija una opción por favor):**   - Bachillerato - Diplomatura /FP /Técnico - Licenciatura - Doctorado | |
| --- | --- | --- |
| **Estado civil:** € Soltero/a € Casado/a € Pareja de hecho € Viudo/a € Divorciado/Separado | | |
| **Asisto a estas Jornadas como:**   - Cuidador de personas enfermas - Familiar de persona enferma - Alumno o estudiante - Voluntario - Trabajador - Otro:_______________________ | | **Por mi profesión (o estudios) pertenezco al ámbito:**   - Sanitario (enfermería, medicina, fisioterapia) - Social (trabajador social, t. ocupacional…) - Psicología - Otro: _______________________________ |

Por favor, primero conteste a estas preguntas:

1. ¿**Sabía** que la Comunidad de Madrid ha promulgado el 9 de marzo de 2017, la **Ley de Derechos y Garantías de las Personas en el Proceso de Morir**? € Sí € No
2. ¿**Conoce** los contenidos de esta Ley? € Sí € No
3. ¿Tiene **formación en Bioética**? € Sí € No

A continuación, le presentamos **definiciones** y **preferencias** sobre conceptos incluidos en la **Ley de Derechos y Garantías de las Personas en el Proceso de Morir.** Por favor, responda a las siguientes preguntas según considere:

| 1. **¿Cuál de las siguientes opciones se corresponde con la definición de SEDACIÓN PALIATIVA?** | | |
| --- | --- | --- |
| (rodee la letra con un círculo): | | |
| 1. Es la disminución deliberada de la consciencia del enfermo, una vez obtenido el oportuno consentimiento, mediante la administración de los fármacos indicados y a las dosis proporcionadas, con el objetivo de evitar un sufrimiento insostenible causado por uno o más síntomas refractarios. 2. Es la provocación intencionada de la muerte de una persona que padece una enfermedad avanzada o terminal, a petición expresa de ésta, y en un contexto médico. | | |
| 1. En España, la sedación paliativa, ¿es legal? | SI | NO |
| 1. ¿Considera la sedación paliativa un recurso adecuado o proporcionado según la circunstancia? | SI | NO |
| 1. Si un familiar suyo estuviera en situación de final de vida, ¿le parecería adecuada esta medida? | SI | NO |
| 1. Y, ¿si fuera para usted? | SI | NO |

***Continúe por favor….***

| 1. **¿Cuál de las siguientes opciones se corresponde con la definición de EUTANASIA?:** | | |
| --- | --- | --- |
| (rodee la letra con un círculo) | | |
| 1. Es la provocación intencionada de la muerte de una persona que padece una enfermedad avanzada o terminal, a petición expresa de ésta, y en un contexto médico 2. Es la ayuda médica para la realización de un suicidio, ante la solicitud de un enfermo, proporcionándole los fármacos necesarios para que él mismo se los administre | | |
| 1. En España, la eutanasia, ¿es legal? | SI | NO |
| 1. ¿Considera la eutanasia un recurso adecuado o proporcionado según la circunstancia? | SI | NO |
| 1. Si un familiar suyo estuviera en situación de final de vida, ¿le parecería adecuada esta medida? | SI | NO |
| 1. Y, ¿si fuera para usted? | SI | NO |

| 1. **¿Cuál de las siguientes opciones se corresponde con la definición de SUICIDIO MÉDICAMENTE ASISTIDO?:** (rodee la letra con un círculo) | | |
| --- | --- | --- |
| 1. Es la ayuda médica para la realización de un suicidio, ante la solicitud de un enfermo, proporcionándole los fármacos necesarios para que él mismo se los administre. 2. Consiste en retirar, ajustar o no instaurar un tratamiento cuando el pronóstico limitado así lo aconseje | | |
| 1. En España, el suicidio médicamente asistido, ¿es legal? | SI | NO |
| 1. ¿Considera el suicidio médicamente asistido un recurso adecuado o proporcionado según la circunstancia? | SI | NO |
| 1. Si un familiar suyo estuviera en situación de final de vida, ¿le parecería adecuada esta medida? | SI | NO |
| 1. Y, ¿si fuera para usted? | SI | NO |

| 1. **¿Cuál de las siguientes opciones se corresponde con la definición de ADECUACION DEL ESFUERZO TERAPÉUTICO?:** (rodee la letra con un círculo) | | |
| --- | --- | --- |
| 1. Consiste en retirar, ajustar o no instaurar un tratamiento cuando el pronóstico limitado así lo aconseje 2. Es la disminución deliberada de la consciencia del enfermo, una vez obtenido el oportuno consentimiento, mediante la administración de los fármacos indicados y a las dosis proporcionadas, con el objetivo de evitar un sufrimiento insostenible causado por uno o más síntomas refractarios | | |
| 1. En España, la adecuación del esfuerzo terapéutico, ¿es legal? | SI | NO |
| 1. ¿Considera la adecuación del esfuerzo terapéutico un recurso adecuado o proporcionado según la circunstancia? | SI | NO |
| 1. Si un familiar suyo estuviera en situación de final de vida, ¿le parecería adecuada esta medida? | SI | NO |
| 1. Y, ¿si fuera para usted? | SI | NO |

**¡Muchas gracias por su colaboración!**

**Por favor, entregue el cuestionario en la mesa de inscripciones**
